# Supplementary material for: The role of triiodothyronine (T3) and T3/free thyroxine (fT4) in glucose metabolism during pregnancy: the Ma’anshan birth cohort study
Source: PubMed Central journal article supplement — Endocr Connect. 2021 Jun 2;10(7):685–93. doi: 10.1530/EC-21-0088 (PMC8240711; doi:10.1530/ec-21-0088), 2021-06-02
Supplement: supplementary_table_1.pdf [file supplementary_table_1.pdf]

Table S1. Associations between thyroid markers and related factors by generalized estimating equation (GEE).

| Variables               | $\beta_1(95\%CI)$              | $\beta_2(95\%CI)$           | $\beta_3(95\%CI)$           | $\beta_4(95\%CI)$         |
|-------------------------|--------------------------------|-----------------------------|-----------------------------|---------------------------|
| <b>Age</b>              | <b>-0.007 (-0.012, -0.003)</b> | <b>-0.06 (-0.08, -0.03)</b> | 0.18 (-0.26, 0.63)          | 0.02 (-0.01, 0.04)        |
| <b>Body Mass Index</b>  | <b>0.03 (0.02, 0.03)</b>       | <b>-0.08 (-0.10, -0.06)</b> | <b>3.14 (2.67, 3.63)</b>    | 0.01 (-0.02, 0.03)        |
| <b>Gestational Week</b> | <b>0.01 (0.01, 0.01)</b>       | <b>-0.17 (-0.18, -0.17)</b> | <b>2.94 (2.87, 3.01)</b>    | <b>0.01 (0.00, 0.02)</b>  |
| <b>Seasonality</b>      |                                |                             |                             |                           |
| Spring                  | Ref                            | Ref                         | Ref                         |                           |
| Summer                  | <b>0.04 (0.01, 0.07)</b>       | <b>0.40 (0.25, 0.56)</b>    | -2.46 (-5.09, 0.17)         | -0.06 (-0.19, 0.06)       |
| Fall                    | 0.02 (-0.01, 0.05)             | -0.13 (-0.28, 0.01)         | <b>4.57 (1.73, 7.41)</b>    | 0.02 (-0.07, 0.12)        |
| Winter                  | <b>0.04 (0.01, 0.07)</b>       | <b>0.29 (0.14, 0.44)</b>    | -1.33 (-4.02, 1.36)         | -0.03 (-0.14, 0.08)       |
| <b>Education</b>        |                                |                             |                             |                           |
| Primary school or below | Ref                            | Ref                         | Ref                         |                           |
| Middle school           | -0.05 (-0.19, 0.10)            | 0.20 (-0.37, 0.78)          | -7.89 (-21.52, 5.75)        | 0.35 (-0.15, 0.85)        |
| High school             | -0.06 (-0.20, 0.09)            | 0.24 (-0.33, 0.81)          | -9.25 (-22.80, 4.30)        | 0.24 (-0.22, 0.71)        |
| Junior college          | -0.07 (-0.21, 0.08)            | 0.11 (-0.45, 0.69)          | -8.02 (-21.54, 5.50)        | 0.13 (-0.32, 0.59)        |
| Undergraduate or above  | -0.10 (-0.26, 0.04)            | 0.14 (-0.44, 0.71)          | -11.48 (-25.11, 2.16)       | 0.06 (-0.40, 0.52)        |
| <b>Income</b>           |                                |                             |                             |                           |
| <1000                   | Ref                            | Ref                         | Ref                         |                           |
| 1000, 2500              | 0.07 (-0.05, 0.18)             | 0.21 (-0.24, 0.66)          | 3.39 (-6.67, 13.66)         | 0.03 (-0.49, 0.55)        |
| 2500, 4000              | 0.04 (-0.07, 0.16)             | 0.10 (-0.34, 0.55)          | 2.74 (-7.37, 12.86)         | -0.19 (-0.67, 0.30)       |
| >4000                   | 0.05 (-0.07, 0.16)             | 0.06 (-0.39, 0.51)          | 3.94 (-6.26, 14.14)         | -0.13 (-0.62, 0.37)       |
| <b>Residence</b>        |                                |                             |                             |                           |
| Urban                   | Ref                            | Ref                         | Ref                         |                           |
| Suburb                  | 0.04 (-0.02, 0.09)             | 0.06 (-0.13, 0.26)          | 1.27 (-3.31, 5.65)          | -0.08 (-0.26, 0.10)       |
| Town                    | 0.01 (-0.10, 0.13)             | -0.20 (-0.64, 0.24)         | 4.23 (-5.29, 13.76)         | -0.19 (-0.67, 0.30)       |
| Rural                   | 0.02 (-0.04, 0.08)             | 0.11 (-0.14, 0.37)          | 0.20 (-4.90, 5.30)          | -0.13 (-0.62, 0.37)       |
| <b>Smoking</b>          |                                |                             |                             |                           |
| No                      | Ref                            | Ref                         | Ref                         |                           |
| Yes                     | <b>0.08 (0.00, 0.16)</b>       | <b>-0.33 (-0.68, -0.03)</b> | <b>11.82 (4.62, 19.02)</b>  | <b>0.11 (-0.24, 0.46)</b> |
| <b>Drinking</b>         |                                |                             |                             |                           |
| Never                   | Ref                            | Ref                         | Ref                         |                           |
| Occasionally            | <b>0.06 (0.003, 0.12)</b>      | -0.04 (-0.26, 0.18)         | <b>5.37 (0.32, 10.42)</b>   | -0.04 (-0.25, 0.18)       |
| Regularly               | <b>0.46 (0.07, 0.84)</b>       | -1.03 (-2.29, 0.21)         | <b>48.81 (30.02, 67.59)</b> | 1.47 (-0.67, 3.62)        |
| <b>Parity</b>           |                                |                             |                             |                           |
| Nulliparous             | Ref                            | Ref                         | Ref                         |                           |
| Multiparous             | 0.01 (-0.04, 0.07)             | <b>0.27 (0.05, 0.50)</b>    | -4.35 (-9.09, 0.39)         | -0.18 (-0.42, 0.06)       |

Abbreviations: CI, confidence interval

$\beta$  adjusted for all the variables listed except the variable itself.

$\beta_1$  is for T3;  $\beta_2$  is for fT4;  $\beta_3$  is for T3/fT4;  $\beta_4$  is for TSH.
