# Supplementary material for: The role of triiodothyronine (T3) and T3/free thyroxine (fT4) in glucose metabolism during pregnancy: the Ma’anshan birth cohort study
Source: PubMed Central journal article supplement — Endocr Connect. 2021 Jun 2;10(7):685–93. doi: 10.1530/EC-21-0088 (PMC8240711; doi:10.1530/ec-21-0088), 2021-06-02
Supplement: supplementary_table_2.pdf [file supplementary_table_2.pdf]

Table S2. Stratified analyses of associations between three thyroid markers and the risk of GDM.

| Trimester                       | Group          | OR <sub>1</sub> (95%CI)   | P    | OR <sub>2</sub> (95%CI)  | P    | OR <sub>2</sub> (95%CI)  | P    |
|---------------------------------|----------------|---------------------------|------|--------------------------|------|--------------------------|------|
| <b>1<sup>st</sup> trimester</b> |                |                           |      |                          |      |                          |      |
|                                 | <b>BMI</b>     |                           | 0.87 |                          | 0.01 |                          | 0.04 |
|                                 | <24            | <b>1.72 (1.32, 2.23)</b>  |      | 0.99 (0.94, 1.04)        |      | <b>1.09 (1.04, 1.13)</b> |      |
|                                 | ≥24            | 1.67 (0.93, 3.00)         |      | <b>1.13 (1.00, 1.28)</b> |      | 1.05 (0.97, 1.14)        |      |
|                                 | <b>Parity</b>  |                           | 0.05 |                          | 0.90 |                          | 0.12 |
|                                 | No             | <b>1.84 (1.43, 2.38)</b>  |      | 0.99 (0.94, 1.04)        |      | <b>1.09 (1.05, 1.14)</b> |      |
|                                 | Yes            | 0.81 (0.41, 1.58)         |      | 0.99 (0.87, 1.14)        |      | 1.02 (0.93, 1.12)        |      |
|                                 | <b>Smoking</b> |                           | 0.90 |                          | 0.13 |                          | 0.43 |
|                                 | No             | <b>1.66 (1.30, 2.11)</b>  |      | 1.00 (0.95, 1.05)        |      | <b>1.08 (1.04, 1.12)</b> |      |
|                                 | Yes            | 4.19 (0.88, 19.85)        |      | 0.65 (0.40, 1.05)        |      | <b>1.29 (1.05, 1.59)</b> |      |
|                                 | <b>TPOAb</b>   |                           | 0.88 |                          | 0.11 |                          | 0.12 |
|                                 | Negative       | <b>1.89 (1.45, 2.47)</b>  |      | 1.00 (0.95, 1.05)        |      | <b>1.09 (1.05, 1.13)</b> |      |
|                                 | Positive       | 1.07 (0.59, 1.94)         |      | 0.96 (0.85, 1.09)        |      | 1.07 (0.98, 1.17)        |      |
|                                 | <b>TGAb</b>    |                           | 0.47 |                          | 0.23 |                          | 0.93 |
|                                 | Negative       | <b>1.70 (1.31, 2.20)</b>  |      | 1.00 (0.95, 1.05)        |      | <b>1.08 (1.04, 1.12)</b> |      |
|                                 | Positive       | 1.86 (0.96, 3.60)         |      | 0.94 (0.81, 1.10)        |      | <b>1.12 (1.02, 1.25)</b> |      |
| <b>2<sup>nd</sup> trimester</b> |                |                           |      |                          |      |                          |      |
|                                 | <b>BMI</b>     |                           | 0.90 |                          | 0.23 |                          | 0.44 |
|                                 | <24            | <b>2.51 (1.88, 3.36)</b>  |      | <b>0.87 (0.79, 0.95)</b> |      | <b>1.10 (1.07, 1.13)</b> |      |
|                                 | >24            | <b>1.95 (1.10, 3.45)</b>  |      | 0.98 (0.81, 1.19)        |      | <b>1.08 (1.02, 1.14)</b> |      |
|                                 | <b>Parity</b>  |                           | 0.40 |                          | 0.91 |                          | 0.96 |
|                                 | No             | <b>2.57 (1.96, 3.37)</b>  |      | <b>0.88 (0.81, 0.96)</b> |      | <b>1.09 (1.07, 1.12)</b> |      |
|                                 | Yes            | 1.96 (0.93, 4.12)         |      | 0.90 (0.70, 1.15)        |      | <b>1.10 (1.02, 1.19)</b> |      |
|                                 | <b>Smoking</b> |                           | 0.31 |                          | 0.38 |                          | 0.71 |
|                                 | No             | <b>2.41 (1.86, 3.12)</b>  |      | <b>0.88 (0.81, 0.95)</b> |      | <b>1.09 (1.07, 1.12)</b> |      |
|                                 | Yes            | <b>9.21 (1.12, 75.68)</b> |      | 1.00 (0.61, 1.63)        |      | 1.16 (0.99, 1.36)        |      |
|                                 | <b>TPOAb</b>   |                           | 0.79 |                          | 0.29 |                          | 0.66 |
|                                 | Negative       | <b>2.61 (2.00, 3.42)</b>  |      | <b>0.89 (0.82, 0.97)</b> |      | <b>1.10 (1.07, 1.13)</b> |      |
|                                 | Positive       | 1.22 (0.44, 3.34)         |      | 0.80 (0.59, 1.09)        |      | 1.02 (0.93, 1.12)        |      |
|                                 | <b>TGAb</b>    |                           | 0.92 |                          | 0.25 |                          | 0.20 |
|                                 | Negative       | <b>2.52 (1.95, 3.26)</b>  |      | <b>0.89 (0.82, 0.96)</b> |      | <b>1.10 (1.07, 1.12)</b> |      |
|                                 | Positive       | 2.62 (0.22, 31.30)        |      | 0.62 (0.28, 1.37)        |      | 1.29 (0.97, 1.73)        |      |

Abbreviations: OR, odds ratio; CI, confidence interval;  
P indicates the P value of interaction.
