# Supplementary material for: The role of triiodothyronine (T3) and T3/free thyroxine (fT4) in glucose metabolism during pregnancy: the Ma’anshan birth cohort study
Source: PubMed Central journal article supplement — Endocr Connect. 2021 Jun 2;10(7):685–93. doi: 10.1530/EC-21-0088 (PMC8240711; doi:10.1530/ec-21-0088), 2021-06-02
Supplement: supplementary_table_3.pdf [file supplementary_table_3.pdf]

Table S3. Sensitivity analyses of the associations of three thyroid markers and the risk of GDM according to the grounds GDM is diagnosed.

| <b>Trimester</b>                | <b>Group</b>              | <b><i>OR</i><sub>1</sub> (95%<i>CI</i>)</b> | <b><i>OR</i><sub>2</sub> (95%<i>CI</i>)</b> | <b><i>OR</i><sub>3</sub> (95%<i>CI</i>)</b> |
|---------------------------------|---------------------------|---------------------------------------------|---------------------------------------------|---------------------------------------------|
| <b>1<sup>st</sup> trimester</b> |                           |                                             |                                             |                                             |
|                                 | High fasting glucose      | <b>1.76 (1.25, 2.47)</b>                    | 0.96 (0.89, 1.04)                           | <b>1.10 (1.05, 1.16)</b>                    |
|                                 | High postprandial glucose | <b>1.66 (1.18, 2.33)</b>                    | 1.03 (0.97, 1.10)                           | <b>1.08 (1.02, 1.14)</b>                    |
|                                 | Both                      | 1.38 (0.80, 2.35)                           | 0.96 (0.86, 1.09)                           | 1.05 (0.97, 1.15)                           |
| <b>2<sup>nd</sup> trimester</b> |                           |                                             |                                             |                                             |
|                                 | High fasting glucose      | <b>2.46 (1.72, 3.54)</b>                    | <b>0.89 (0.79, 1.00)</b>                    | <b>1.10 (1.06, 1.14)</b>                    |
|                                 | High postprandial glucose | <b>2.40 (1.64, 3.49)</b>                    | <b>0.87 (0.77, 0.99)</b>                    | <b>1.09 (1.05, 1.13)</b>                    |
|                                 | Both                      | <b>2.57 (1.47, 4.51)</b>                    | 0.89 (0.74, 1.07)                           | <b>1.10 (1.05, 1.17)</b>                    |

Abbreviations: OR, odds ratio; CI, confidence interval;  
*OR*<sub>1</sub> is for T3; *OR*<sub>2</sub> is for T3/FT4; *OR*<sub>3</sub> is for TSH.
