# Supplementary material for: The role of triiodothyronine (T3) and T3/free thyroxine (fT4) in glucose metabolism during pregnancy: the Ma’anshan birth cohort study
Source: PubMed Central journal article supplement — Endocr Connect. 2021 Jun 2;10(7):685–93. doi: 10.1530/EC-21-0088 (PMC8240711; doi:10.1530/ec-21-0088), 2021-06-02
Supplement: supplementary_table_4.pdf [file supplementary_table_4.pdf]

Table S4. Comparison of area under curve (AUC) among different models.

| <b>Models</b> | <b>Z (P)</b>   |                |                |                |
|---------------|----------------|----------------|----------------|----------------|
|               | <b>Model 1</b> | <b>Model 2</b> | <b>Model 3</b> | <b>Model 4</b> |
| Model 1       | 1              |                |                |                |
| Model 2       | 1.25 (0.211)   | 1              |                |                |
| Model 3       | 2.88 (0.004)   | 2.59 (0.010)   | 1              |                |
| Model 4       | 2.34 (0.019)   | 2.04 (0.041)   | 0.40 (0.690)   | 1              |

Model 1 including maternal age, pre-pregnancy BMI, history of family diabetes, and season of conception;

Model 2 based on model 1, plus fasting plasma glucose and sampling gestational week;

Model 3 based on model 2, plus T3;

Model 4 based on model 2, plus T3/ft4.
